# Supplementary material for: The Instrument for Stress-Oriented Task Analysis (ISTA)
Source: Atypon-hosted journal article supplement (doi:10.1026/0932-4089/a000312), 2019-10-01
Supplement: 0932-4089_a000312_esm1.pdf [file 0932-4089_a000312_esm1.pdf]

## **The Instrument for Stress-Oriented Task Analysis ISTA: A Meta-Analysis**

Julien P. Irmer<sup>1</sup>, Marcel Kern<sup>1</sup>, Karin Schermelleh-Engel<sup>1</sup>, Norbert K. Semmer<sup>2</sup> & Dieter Zapf<sup>1</sup>

1 Goethe- University Frankfurt, Germany

2 University of Berne, Switzerland

accepted 2019/01:

**Zeitschrift für Arbeits- & Organisationspsychologie – German Journal of Work and  
Organizational Psychology**

### **Appendix**

#### Content

- A) Studies
- B) Reliability Studies
- C) Meta-analytical Procedures
- D) The ISTA Instrument – German Version
- E) The ISTA Instrument – English Version

## A The Studies

*Table A* Studies Included in the Meta-Analysis

| Study<br>number | Reference                                                                                                                                                                                                                                                                                                                                                                                                                                                                                      |
|-----------------|------------------------------------------------------------------------------------------------------------------------------------------------------------------------------------------------------------------------------------------------------------------------------------------------------------------------------------------------------------------------------------------------------------------------------------------------------------------------------------------------|
| 1               | Zapf, D. (1993). Stress-oriented analysis of computerized office work. <i>European Work and Organizational Psychologist</i> , 3(2), 85-100.                                                                                                                                                                                                                                                                                                                                                    |
| 2               | Hilse, H. (1996). <i>Netzwerke contra Hierarchie: Die Abbildung organisationsstruktureller Widersprüche in einem neuartigen Potential für Rollenstreß</i> . Unpublished diploma thesis, Universität Konstanz.<br><br>Parts of the data published in Hilse, H., Götz, K., & Zapf, D. (1998). Netzwerk contra Hierarchie. Rollenkonflikte und Rollenambiguität beim Übergang von hierarchischen Organisationsstrukturen zur Projektarbeit. <i>Grundlagen der Weiterbildung (Heft 1)</i> , 34-40. |
| 3               | Dolny, J. (1997). <i>Das Burnoutsyndrom bei Mitarbeitern eines Altenwohnstiftes</i> . Unpublished diploma thesis, Universität Konstanz.                                                                                                                                                                                                                                                                                                                                                        |
| 4               | Hügel, I. (1999). <i>Kreuzkulturelle Studie psychologischer Arbeitsanalyseverfahren. Validierung des Fragebogens ISTA in Bezug auf die italienische Sprache</i> . Unpublished diploma thesis, Universität Konstanz.                                                                                                                                                                                                                                                                            |
| 5               | Gorißen, B. (1999). <i>Zum Einfluss von psychischen Belastungen von Berufsfeuerwehrlern auf der Wache und im Einsatz auf die Befindlichkeit</i> . Unpublished diploma thesis, J. W. Goethe-Universität Frankfurt am Main: Institut für Psychologie.                                                                                                                                                                                                                                            |
| 6               | Grzegorzek, J. (1999). <i>Validierungsstudie des Fragebogens ISTA (Instrument zur stressbezogenen Arbeitsanalyse). Kreuzkulturelle Studie</i> . Unpublished diploma thesis, Universität Konstanz.                                                                                                                                                                                                                                                                                              |
| 7               | Isic, A. (1999). <i>Psychische Anforderungen in Dienstleistungsberufen am Beispiel Call Center</i> . Unpublished diploma thesis, J. W. Goethe-Universität Frankfurt am Main: Institut für Psychologie.<br><br>Data published in Isic, A., Dormann, C., & Zapf, D (1999). Belastungen und Ressourcen bei Call-Center-Arbeitsplätzen. <i>Zeitschrift für Arbeitswissenschaft</i> , 53, 202-208.                                                                                                  |

8 Lausmann, C. (1999). *Evaluierung einer Computerversion des Instruments zur streßbezogenen Arbeitsanalyse "ISTA"*. Unpublished diploma thesis, J. W. Goethe-Universität Frankfurt am Main: Institut für Psychologie.

9 Seifert, C. (1999). *Die Bedeutsamkeit der emotionalen Arbeit als Streßfaktor im Servicebereich und ihre Interaktion mit Entscheidungsspielräumen*. Unpublished diploma thesis, J. W. Goethe-Universität Frankfurt am Main: Institut für Psychologie.

Data published in Zapf, D., Seifert, C., Schmutte, B., Mertini, H. & Holz, M. (2001). Emotion work and job stressors and their effects on burnout. *Psychology & Health, 16*, 527-545.

10 Schmutte, B. (1999). *Emotionsarbeit und ihre Konsequenzen bei Bankarbeitern*. Unpublished diploma thesis, J. W. Goethe-Universität Frankfurt am Main: Institut für Psychologie.

Data published in Zapf, D., Seifert, C., Schmutte, B., Mertini, H. & Holz, M. (2001). Emotion work and job stressors and their effects on burnout. *Psychology & Health, 16*, 527-545.

11 Vogt, C. (1999). *Emotionale Anforderungen am Arbeitsplatz*. Unpublished diploma thesis, Universität Konstanz.

12 Banat, J. (2000). *Der Einfluß von interaktionsbezogenen Arbeitsmerkmalen und Kundenorientierung auf Burnout in indirekt personenbezogenen Dienstleistungstätigkeiten*. Unpublished diploma thesis, J. W. Goethe-Universität Frankfurt am Main: Institut für Psychologie.

13 Egold, N. (2000). *Zur Messung von Kundenorientierung bei Dienstleistern und der Zufriedenheit von Kunden - Validierung eines Instrumentes zur Erfassung der persönlichen Kundenorientierung von Dienstleistern*. Unpublished diploma thesis, J. W. Goethe-Universität Frankfurt am Main: Institut für Psychologie.

14 Holz, M. (2000). *Emotionsarbeit in Kindergartenstätten*. Unpublished diploma thesis, J. W. Goethe-Universität Frankfurt am Main: Institut für Psychologie.

Data published in Zapf, D., Seifert, C., Schmutte, B., Mertini, H. & Holz, M. (2001). Emotion work and job stressors and their effects on burnout. *Psychology & Health, 16*, 527-545.

15 Sonnentag, S. (2001). Work, recovery activities, and individual well-being: A diary study. *Journal of Occupational Health Psychology, 6*, 196–210.

- 16 Gorißen, B. (2002). *Psychische Beeinträchtigungen in den Arbeitsbereichen Wachalltag und Einsatz der Berufsfeuerwehrleute: Eine Längsschnittstudie*. Unpublished dissertation, J. W. Goethe-Universität Frankfurt am Main: Institut für Psychologie.
- 17 Zapf, D., Isic, A., Bechtoldt, M., & Blau, P. (2003). What is typical for call centre jobs? Job characteristics, and service interactions in different call centres. *European Journal of Work and Organizational Psychology*, 12(4), 311-340. doi:10.1080/13594320344000183
- 18 Dormann, C., & Zapf, D. (2004). Customer-related social stressors and burnout. *Journal of Occupational Health Psychology*, 9, 61-82.
- 19 Jannssen, A. (2004). *Einfluss kundenbezogener sozialer Stressoren auf das Befinden von Altenpflegern*. Unpublished diploma thesis, J. W. Goethe-Universität Frankfurt am Main: Institut für Psychologie.
- 20 Gramatzik, J. von (2005). *Stressbewältigung im Kundenkontakt*. Unpublished diploma thesis, J. W. Goethe-Universität Frankfurt am Main: Institut für Psychologie.
- 21 Weser, D. (2005). *Auswirkungen von Stressoren und Ressourcen auf die Dienstleistungszufriedenheit in medizinischen Praxen*. Unpublished diploma thesis, J. W. Goethe-Universität Frankfurt am Main: Institut für Psychologie.
- 22 Ohly, S., Sonnentag, S. & Pluntke, F. (2006). Routinization, work characteristics and their relationships with creative and proactive behaviors. *Journal of Organizational Behavior*, 27, 257-279.
- 23 Kahlow, A. (2007). *Zusammenhänge zwischen Arbeitsunfällen und sozialer Unterstützung, Sicherheitsklima sowie negativem Betriebsklima*. Unpublished diploma thesis, J. W. Goethe-Universität Frankfurt am Main: Institut für Psychologie.
- Parts of the data published in Kahlow, A., Zapf, D., & Kunz, T. (2014). Zusammenhänge zwischen dem Arbeitsunfallgeschehen und sozialer Unterstützung, negativem Betriebsklima sowie Sicherheitsklima. *Zeitschrift für Arbeitswissenschaft*, 68(3), 143-152.
- 24 Kuttler, I. (2007). *Pfarrer in der Krise? Zusammenhänge zwischen Arbeitsanforderungen im Pfarrerberuf und dem Burnout-Syndrom*. Unpublished diploma thesis, J. W. Goethe-Universität Frankfurt am Main: Institut für Psychologie.
- 25 Langendörfer, F. (2008). Personality differences among orchestra instrumental groups: Just a stereotype? *Personality and Individual Differences*, 44,

610–620.

- 26 Müller-Calleja, L. (2008). *Auswirkung von Dienstleistungsorientierung auf das Stressempfinden von Lehrkräften: Ressource oder Risikofaktor?* Unpublished diploma thesis, J. W. Goethe-Universität Frankfurt am Main: Institut für Psychologie.
- 27 Zacher, H., Degner, M., Seevaldt, R., Frese, M., & Lüdde, J. (2009). Was wollen jüngere und ältere Erwerbstätige erreichen? Altersbezogene Unterschiede in den Inhalten und Merkmalen beruflicher Ziele [What do younger and older workers want to accomplish? Age-related differences in content and characteristics of occupational goals]. *Zeitschrift für Personalpsychologie*, 8, 191–200.  
doi:10.1026/1617-6391.8.4.191
- 28 Kaiser, D. (2001). *Arbeitsbedingungen und Kundenzufriedenheit in Dienstleistungsberufen*. Unpublished diploma thesis, J. W. Goethe-Universität Frankfurt am Main: Institut für Psychologie.
- Parts of the data published in: Dormann, C. & Kaiser, D. (2002). Job conditions and customer satisfaction. *European Journal of Work & Organizational Psychology*, 11, 257-283.
- 29-34 Zapf, D., & Holz, M. (2002). *Social stressors in organisations - The development of an instrument*. J. W. Goethe-Universität Frankfurt am Main: Institut für Psychologie.
- Parts of the data published in: Rubino C., Perry S. J., Milam, A. C., Spitzmueller, C., & Zapf, D. (2012). Demand-control-person: integrating the demand-control and conservation of resources models to test an expanded stressor-strain model. *Journal of Occupational Health Psychology*, 17 (4), 456-472. doi: 10.1037/a0029718.
- 35 Zapf, D., & Trumpold, K. (2012). *Ergebnisbericht Analyse arbeitsplatzbezogener Ressourcen und Belastungen im CSC der Continental Reifen Deutschland GmbH*. Unveröffentlichter Bericht, J. W. Goethe-Universität Frankfurt am Main: Institut für Psychologie.
- 36 Zapf, D., Machowski, S., & Bernhardt, L. (2012). *Gefährdungsbeurteilung Mitarbeiter-Befragung bei der Frankfurter Sparkasse zu Psychischen Belastungen und Ressourcen am Arbeitsplatz*. Unveröffentlichter Bericht, J. W. Goethe-Universität Frankfurt am Main: Institut für Psychologie.
- 37 Von Gilsa, L., & Zapf, D. (2012). *Gefährdungsbeurteilung Mitarbeiter-Befragung zu Psychischen Belastungen und Ressourcen am Arbeitsplatz*. Unveröffentlichter Bericht, J. W. Goethe-Universität Frankfurt am Main: Institut für Psychologie.

- 38 Zapf, D., Dormann, T., & Irmer, C. (2003). *Anforderungen, Stressoren und Ressourcen in der Traktorenendmontage der John Deere Traktorenfabrik Mannheim*. Untersuchungsbericht. Unveröffentlichter Bericht, J. W. Goethe-Universität Frankfurt am Main: Institut für Psychologie.
- 39 Dormann, T., Dormann, C., Zapf, D., & Irmer, C. (2004). Belastungen im Schulsekretariat. Aufgaben und Probleme an einer pädagogischen Schnittstelle. *Die Schule, 96*, 345-358.
- 40 Zapf, D., Isic, A., Bechtoldt, M., & Blau, P. (2003). What is typical for call centre jobs? Job characteristics, and service interactions in different call centres. *European Journal of Work and Organizational Psychology, 12*(4), 311-340. doi:10.1080/13594320344000183
- 41 Bolm-Audorff, U., & Zapf, D. (2013). *Psychische Arbeitsbelastungen und Gesundheit bei Busfahrern*. Unpublished data, J. W. Goethe-Universität Frankfurt am Main: Institut für Psychologie in Zusammenarbeit mit Regierungspräsidium Darmstadt, Abt. Arbeitsschutz und Umwelt Dezernat, Landesgewerbeamt.
- 42-43 Zapf, D. (2012). *Psychische Arbeitsbelastungen und Gesundheit bei Alten- und Krankenpflegern. Technischer Bericht Arbeitspsychologie*. Unveröffentlichter Bericht, J. W. Goethe-Universität Frankfurt am Main: Institut für Psychologie in Zusammenarbeit mit Regierungspräsidium Darmstadt, Abt. Arbeitsschutz und Umwelt Dezernat, Landesgewerbeamt.
- 44 Zapf, D. (2012). *Psychische Arbeitsbelastungen und Gesundheit bei Ärzten. Technischer Bericht Arbeitspsychologie*. Unveröffentlichter Bericht, J. W. Goethe-Universität Frankfurt am Main: Institut für Psychologie in Zusammenarbeit mit Regierungspräsidium Darmstadt, Abt. Arbeitsschutz und Umwelt Dezernat, Landesgewerbeamt.
- 45 Bolm-Audorff, U., & Zapf, D. (2013). *Psychische Arbeitsbelastungen und Gesundheit bei Busfahrern*. Unpublished data, J. W. Goethe-Universität Frankfurt am Main: Institut für Psychologie in Zusammenarbeit mit Regierungspräsidium Darmstadt, Abt. Arbeitsschutz und Umwelt Dezernat, Landesgewerbeamt.
- 46 Zapf, D. (2005). *Mitarbeiterbefragung am FB02 Wirtschaftswissenschaften - Allgemeine Ergebnisrückmeldung*. Unveröffentlichter Bericht, J. W. Goethe-Universität Frankfurt am Main: Institut für Psychologie.
- 47 Zapf, D. (2005). *Mitarbeiterbefragung am FB02 Wirtschaftswissenschaften - Allgemeine Ergebnisrückmeldung*. Unveröffentlichter Bericht, J. W. Goethe-Universität Frankfurt am Main: Institut für Psychologie.

- 48-49 Jenderek, K., Schwickerath, J. & Zapf, D. (2008). *Victims of Workplace Bullying in a Psychosomatic Hospital. Symposium "Workplace Bullying and Health: Organizational and Personal Interventions"*. 8th Conference of the European Academy of Occupational Health Psychology, 12-14 November 2008, Valencia, Spain.
- 50 Zapf, D., Elian, C., Weber, A., Keck, A., & Trumpold, K. (2007). *Emotionsarbeit in Dienstleistungsberufen – Tagebuchstudie*. Unpublished data, J. W. Goethe-Universität Frankfurt am Main: Institut für Psychologie.
- 51 Tabarteh-Farahami, A. (1998). *Mitarbeiterbefragung im Regierungspräsidium Tübingen*. Unpublished data.
- 52 Paproth, P. (2000). *Mitarbeiterbefragung in Alters- und Pflegeheimen*. Unveröffentlichte Daten, ETH Zürich, Institut für Arbeitspsychologie.
- 53 Köhlbach, M. (2008). *Auswirkungen der Intervention des politisch-administrativen Systems im Rahmen der Verwaltungsreform auf die Arbeitsbedingungen und das Verhalten und Erleben der Betroffenen – Veränderungsmessung im Reformprozess einer hessischen Landesverwaltung*. Unpublished dissertation, J. W. Goethe-Universität Frankfurt am Main: Institut für Psychologie.
- 54 Groß, C. (2004). *Analyse sozialer Konflikte und Mobbing am Arbeitsplatz einer Tagebuchstudie*. Unpublished dissertation, J. W. Goethe-Universität Frankfurt am Main: Institut für Psychologie.
- 55 Bolm-Audorff, U., & Zapf, D. (2005). *Psychische Arbeitsbelastungen und Gesundheit bei Bahnarbeitern*. Unpublished data, J. W. Goethe-Universität Frankfurt am Main: Institut für Psychologie in Zusammenarbeit mit Regierungspräsidium Darmstadt, Abt. Arbeitsschutz und Umwelt Dezernat, Landesgewerbeamt.
- 56 Egold, N. W. (2007). *Kundenorientierung und Kundenzufriedenheit: Korrelate der personalen und organisationalen Kundenorientierung*. Unpublished dissertation, J. W. Goethe-Universität Frankfurt am Main: Institut für Psychologie.
- 57 Heissler, C., Kern, M., & Zapf, D. (2014). *Disponentenbefragung zu Arbeit und Gesundheit*. Unpublished data, J. W. Goethe-Universität Frankfurt am Main: Institut für Psychologie.
- 58 Egold, N. W. (2000). *Zur Messung von Kundenorientierung bei Dienstleistern und der Zufriedenheit von Kunden*. Unpublished diploma thesis, J. W. Goethe-Universität Frankfurt am Main: Institut für Psychologie.
-

## B Retest-Reliability Studies

*Table B* Retest-Reliability Studies Included in the Meta-Analysis

| Study<br>number | Reference                                                                                                                                                                                                                  |
|-----------------|----------------------------------------------------------------------------------------------------------------------------------------------------------------------------------------------------------------------------|
| 4               | Hügel, I. (1999). <i>Kreuzkulturelle Studie psychologischer Arbeitsanalyseverfahren. Validierung des Fragebogens ISTA in Bezug auf die italienische Sprache</i> . Unpublished diploma thesis, Universität Konstanz.        |
| 6               | Grzegorzek, J. (1999). <i>Validierungsstudie des Fragebogens ISTA (Instrument zur stressbezogenen Arbeitsanalyse). Kreuzkulturelle Studie</i> . Unpublished diploma thesis, Universität Konstanz.                          |
| 8               | Lausmann, C. (1999). <i>Evaluierung einer Computerversion des Instruments zur streßbezogenen Arbeitsanalyse "ISTA"</i> . Unpublished diploma thesis, J. W. Goethe-Universität Frankfurt am Main: Institut für Psychologie. |
| 29              | Zapf, D., & Holz, M. (2002). <i>Social stressors in organisations - The development of an instrument</i> . J. W. Goethe-Universität Frankfurt am Main: Institut für Psychologie. (Sample: JUS)                             |



### C Meta-analytical Procedures

In order to examine overall meta-analytic effects, different kinds of models can be used: fixed effects models, random effects models and mixed effects models (Hedges, 1992; Hunter & Schmidt, 2004; Viechtbauer, 2010a, 2010b). The fixed effects model assumes that all samples are drawn from the same population. Thus, the true population effect size is the same for all drawn studies while all observed differences are due to random errors (Hedges, 1992). The random effects model, however, assumes, that effect sizes vary between studies, since they are not all drawn from the same population and additionally contain random errors. The heterogeneity between studies, however, is assumed to be of random nature (Hunter & Schmidt, 2004; Viechtbauer, 2010a, 2010b). If mistakenly a fixed effects model were used instead of a random effects model, this then would result in different confidence intervals and would have critical influence on significance tests. This is due to possibly smaller standard errors for effect sizes and will result in smaller confidence intervals and easier significance in tests, which ultimately results in an inflation of type I-errors (Hedges, 1992). Within the mixed effects model part of the heterogeneity is explained through moderator variables, which are included in the model (Viechtbauer, 2010a, 2010b). For this paper random effects models were used, since it is unreasonable to assume, that all subjects working in different economic sectors are drawn from the same population of employees.

The data passed to account in this meta-analysis were scale means, reliability via the internal consistency (Cronbach's  $\alpha$ ) and via the retest-reliability of the variables means, variable standard deviations, correlations between the scales or indices and sample sizes of the ISTA-scales and the dependent variables. To get an overall mean for a certain scale or correlation, all the scale means or correlations have to be taken into calculations. In order to calculate corrected correlations, these correlations need to be corrected for unreliability (see Equation (1)) as suggested by Spearman (1904). Here the observed correlation  $r_{xy}$  is divided by the square root of the reliabilities of variable x and y respectively (Spearman, 1904). The reliabilities are either the internal consistency of the scale (Cronbach's  $\alpha$ ) for all scales or the retest-reliability for all indices.

$$r_{xy_{corrected}} = \frac{r_{xy}}{\sqrt{r_{xx}r_{yy}}} \quad (1)$$

If reliabilities were missing, the mean reliability was used. This mean reliability was calculated in the same meta-analytical way, as were the reliability corrected correlations themselves. Correlations (corrected as well as uncorrected correlations) then were

transformed into the metric scale using the Fisher-transformation (Fisher, 1921). After transforming the correlation, the transformed value has a standard error independent of the value of the correlation itself. The standard error is only dependent on sample size (see Equation (2)). Here  $r_{xy}$  is the correlation between variable x and variable y after correction for unreliability,  $z_{r_{xy}}$  is the newly calculated value,  $\ln$  denotes the natural logarithm,  $n$  is the sample size and  $r_{xy_z}$  is equal to the retransformation-equation (see Equation (3), Fisher, 1921). These transformations are done for every correlation in each study.

$$z_{r_{xy}} = \frac{1}{2} \ln \left( \frac{1 + r_{xy}}{1 - r_{xy}} \right), \quad SE(z_{r_{xy}}) = \frac{1}{\sqrt{n - 3}} \quad (2)$$

$$r_{xy_z} = \frac{e^{2z_{r_{xy}}} - 1}{e^{2z_{r_{xy}}} + 1} \quad (3)$$

After correlations have been transformed into metric scale, the meta-analytical calculations as for the mean or the standard deviation are identical with the ones of correlations (Viechtbauer, 2010b). Within the random effects model a scale measure (here for instance: mean of study  $i$ ) is expected to be a linear combination of a true value for the attribute  $\theta_i$  and a random error  $\epsilon_i$ , which is normally distributed with a mean of zero and variance of the squared standard error of the mean and can be different for every study  $i$  (see Equation (4)).

$$\bar{y}_i = \theta_i + \epsilon_i, \quad \epsilon_i \sim \mathcal{N}(0, v_i) \quad (4)$$

These true values  $\theta_i$  vary randomly with a true mean  $\mu$  and a random error  $u_i$  for the  $i$ -th study due to the proposed model (see Equation (5)).

$$\theta_i = \mu + u_i \quad u_i \sim \mathcal{N}(0, \tau^2) \quad (5)$$

The aim of the calculations is to gain the true effect  $\mu$  and the total amount of heterogeneity  $\tau^2$  within the studies. If  $\tau^2 = 0$ , all of the true effects per study are equal, which implies homogeneity among the true effects. This is equivalent to  $\theta_1 = \dots = \theta_i = \dots = \theta_k = \mu$  and the premise for the fixed effects model ( $k$  is the total number of studies within the meta-analysis). For the fixed effects model the true effect can be calculated through  $\hat{\theta}$  (see Equation (6)), where  $v_i$  is the squared standard error of the scale mean or the squared standard error of the calculated z-value (see Equation (2)). These values are needed for further calculations within the random effects model (Viechtbauer, 2010a, 2010b). Standard error weighting is used whenever possible instead of sample size weighting, as the weight is then proportional to sample size and anti-proportional to the variation within the study and, therefore, the errors within the study. This was used for scale means. The standard error of the transformed correlation is dependent only on sample size, therefore,

standard error weighting, too, was used for corrected and uncorrected correlations. As no standard error for standard deviations was given, sample size weighting was used for standard deviations.

$$\hat{\theta} = \frac{\sum_{i=1}^k w_i \bar{y}_i}{\sum_{i=1}^k w_i}, \quad w_i = \frac{1}{v_i}, \quad SE(\hat{\theta}) = \sqrt{\frac{1}{\sum_{i=1}^k w_i}} \quad (6)$$

To test whether the studies are heterogeneous or homogeneous, a Q statistic (see Equation (7)) can be calculated in order to test  $H_0 : \theta_1 = \dots = \theta_k$ . This statistic uses the previously calculated estimation of the true effect under the premise, that the data follows a fixed effects model, and will be needed to determine the amount of heterogeneity within the studies (if present) and to correct for that matter (Viechtbauer, 2010b). Under the null-hypothesis Q is  $\chi^2$ -distributed with k-1 degrees of freedom:

$$Q = \sum_{i=1}^k w_i (\bar{y}_i - \hat{\theta})^2, \quad Q \stackrel{H_0}{\sim} \chi^2(k-1) \quad (7)$$

In order to do so, the total amount of heterogeneity  $\tau_T^2$  needs to be estimated. One common estimator for  $\tau_T^2$  is the DerSimonian-Laird-Estimator (see Equation (8), Viechtbauer, 2010b). If  $\hat{\tau}_T^2 < 0$ , the value of heterogeneity-variance is set to zero. Special about this estimator is that it uses deterministic calculations and no computational approximation is necessary (DerSimonian & Laird, 1986). This is why it is used within this study. Exploratory calculations using different calculation methods for  $\tau_T^2$  were conducted indicating no differences in results.

$$\hat{\tau}_T^2 = \frac{Q - (k-1)}{\sum_{i=1}^k w_i - \frac{\sum_{i=1}^k w_i^2}{\sum_{i=1}^k w_i}} \quad (8)$$

Now the weights for each study can be recalculated and the overall effect  $\mu$  can be estimated (see Equation (9)) (Viechtbauer, 2010b). The standard error of  $\hat{\mu}$  is used to determine confidence intervals for the true effect sizes. All calculations for correlations are conducted equivalently. After calculating all necessary values (true effect sizes, standard errors, confidence intervals) these then need to be retransformed into the correlation-scale via the Fisher-transformation (Fisher, 1921) as done in Equation (3) (Viechtbauer, 2010b).

$$\tilde{w}_i = \frac{1}{\hat{\tau}_T^2 + v_i} \implies \hat{\mu} = \frac{\sum_{i=1}^k \tilde{w}_i \bar{y}_i}{\sum_{i=1}^k \tilde{w}_i}, \quad SE(\hat{\mu}) = \sqrt{\frac{1}{\sum_{i=1}^k \tilde{w}_i}} \quad (9)$$

The standard error and the estimated value  $\hat{\mu}$  can be used to compute a confidence interval for the true effect  $\mu$ , for example:  $\hat{\mu} \pm 1.96SE(\hat{\mu})$  for a 95% confidence

interval. As  $\tau_T^2$  is hard to interpret, the total amount of heterogeneity in percent can be estimated (see Equation (10), Higgins, Thompson, Deeks & Altman, 2003, as cited in Viechtbauer, 2010b). Here,  $Q$  is the statistic used to test the hypothesis of a fixed effects model and  $k$  is the number of samples taken into account. As discussed earlier,  $Q$  is  $\chi^2$ -distributed with  $k-1$  degrees of freedom. The expectation of  $Q$  under the null-hypothesis, that there is actually a fixed effects model present, is  $k-1$ . Therefore, the expectancy of  $I^2$  is 0% under the assumption of a fixed effects model.

$$I^2 = \left(1 - \frac{(k-1)}{Q}\right) * 100\% \quad (10)$$

Calculations and data preprocessing were computed using the statistics software R (R Core Team, 2015) partly using the “metafor” package by Viechtbauer (2010a), which has implementations of the calculations and estimations presented in this section.

## References

- DerSimonian, R., & Laird, N. (1986). Meta-analysis in clinical trials. *Controlled Clinical Trials*, 7, 177-188.
- Fisher. (1921). On the “probable error” of a coefficient of correlation deduced from a small sample. *Metron*, 1, 1–32.
- Hedges, L. V. (1992). Meta-Analysis. *Journal of Educational Statistics*, 17(4), 279-296.
- Hunter, J. E., & Schmidt, F. L. (2004). *Methods of meta-analysis : Correcting error and bias in research findings*. Thousand Oaks, CA: Sage.
- R Core Team. (2015). R: A language and environment for statistical computing. Vienna, Austria: R Foundation for Statistical Computing. Retrieved from <https://www.R-project.org/>
- Spearman, C. (1904). The proof and measurement of association between two things. *The American Journal of Psychology*, 15(1), 72-101.
- Viechtbauer, W. (2010a). Conducting meta-analyses in R with the metafor package. *Journal of Statistical Software*, 36(3), 1-48.
- Viechtbauer, W. (2010b). Meta-Analyse. In H. Holling & B. Schmitz (Eds.), *Handbuch Statistik, Methoden und Evaluation*. Göttingen: Hogrefe.

## **D The ISTA – Instrument – German Version**

**ISTA**

**Instrument zur Stressbezogenen  
Arbeitsanalyse**

**Autoren: Semmer, N.; Zapf, D.; Dunckel, H.**

**Version 6.1**

**Bern, Frankfurt, Flensburg: Januar 2007**

## ISTA - Instrument zur Stressbezogenen Arbeitsanalyse

Autoren: Semmer, N.; Zapf, D.; Dunckel, H.  
Version 6.0

Bern, Frankfurt, Flensburg: Mai 1998

### Quellen:

- Semmer, N. (1984). **Stressbezogene Tätigkeitsanalyse**. Weinheim und Basel: Beltz.
- Semmer, N., Dunckel, H. (1991). Stressbezogene Arbeitsanalyse. In S. Greif, E. Bamberg, & N. Semmer (Hrsg.) **Psychischer Stress am Arbeitsplatz** (S. 57-90). Göttingen: Hogrefe.
- Semmer, N.K., Zapf, D., & Dunckel, H. (1998). Instrument zur stressbezogenen Tätigkeitsanalyse ISTA. In H. Dunckel (Hrsg.). **Handbuch der Instrumente zur Arbeitsanalyse**. Zürich: Verlag der Fachvereine Hochschulverlag.
- Zapf, D. (1991). Stressbezogene Arbeitsanalyse bei der Arbeit mit unterschiedlichen Bürosoftwaresystemen. **Zeitschrift für Arbeits- und Organisationspsychologie**, 35, 2-14.
- Zapf, D., Bamberg, E., Dunckel, H., Frese, M., Greif, S., Mohr, G., Rückert, D. & Semmer, N. (1983). **Dokumentation der Skalen des Forschungsprojekts "Psychischer Stress am Arbeitsplatz - hemmende und fördernde Bedingungen für humanere Arbeitsplätze"**. Vervielfältigtes Manuskript: Universität Osnabrück.

### ISTA - enthält folgende Skalen:

|                                          |                         |                                                |                          |
|------------------------------------------|-------------------------|------------------------------------------------|--------------------------|
| <b>Soziodemographische Angaben:</b>      | SD1 - SD8               | <b>Zeitdruck:</b>                              | ZD1 - ZD4, ZD6           |
| <b>Qualifikationsanfordernisse:</b>      | QU1 - QU3               | <b>Kommunikationsmöglichkeiten:</b>            | KOM1 - KOM3              |
| <b>Komplexität:</b>                      | AK2, AK3, AK4, AK7, AK8 | <b>Kooperationsspielraum:</b>                  | KSP3- KSP5               |
| <b>Handlungsspielraum:</b>               | HS1 - HS4, HS7          | <b>Kooperationsenge:</b>                       | KOP1 - KOP3, KOP7, KOP8  |
| <b>Partizipation:</b>                    | PA1 - PA7               | <b>Kooperationserfordernisse:</b>              | KER1 -KER4               |
| <b>Variabilität:</b>                     | VA1 - VA4, VA6          | <b>Folgende Items müssen recodiert werden:</b> | AK2 AK7 AK8<br>AOP4 AOP8 |
| <b>Zeitspielraum:</b>                    | ZS1 ZS3 - ZS6           |                                                |                          |
| <b>Unsicherheit:</b>                     | UN4 - UN8               |                                                |                          |
| <b>Unfallgefährdung:</b>                 | UG1 - UG5               |                                                |                          |
| <b>Arbeitsorganisatorische Probleme:</b> | AOP1 - AOP4, AOP8       |                                                |                          |
| <b>Einseitige Belastung</b>              | EBA1 EBA6               |                                                |                          |
| <b>Umgebungsbelastungen:</b>             | UGB1 - UGB17            |                                                |                          |
| <b>Arbeitsunterbrechungen:</b>           | AUB1 - AUB4, AUB7       |                                                |                          |
| <b>Konzentrationsanforderungen:</b>      | KON2 - KON6             |                                                |                          |

SD1 Wie **alt** sind Sie?

\_\_\_\_\_ Jahre

SD2 **Geschlecht**

Frau ( ) 1                      Mann ( ) 2

SD3 Welche **Schulbildung** haben Sie?

- Hauptschule ohne Abschluß ( ) 1
- Hauptschule mit Abschluß ( ) 2
- Realschule ( ) 3
- Abitur/Fachabitur ( ) 4
- Studium an einer Fachakademie o.ä. ( ) 5
- Fachhochschulabschluß ( ) 6
- Universitätsabschluß ( ) 7

SD4 Welche **Berufsausbildung** haben Sie insgesamt?

- keinen Abschluß ( ) 1
- abgeschlossene Lehre ( ) 2
- Meisterprüfung o. Abschluß einer Fachschule ( ) 3
- Diplom, Magister o.ä. ( ) 4

Sollten mehrere Möglichkeiten auf Sie zutreffen, kreuzen Sie bitte diejenige mit der höchsten Nummer an!

SD5 Welche **Berufsausbildung** haben Sie in bezug auf Ihre jetzige Tätigkeit?

- keinen Abschluß ( ) 1
- abgeschlossene Lehre ( ) 2
- Meisterprüfung o. Abschluß einer Fachschule ( ) 3
- Diplom, Magister o.ä. ( ) 4

Sollten mehrere Möglichkeiten auf Sie zutreffen, kreuzen Sie bitte diejenige mit der höchsten Nummer an!

SD6 Wie lange sind Sie schon **berufstätig**?

- weniger als 3 Monate ( ) 01
- mehr als 3 Monate bis 6 Monate ( ) 02
- mehr als 6 Monate bis 1 Jahr ( ) 03
- mehr als 1 Jahr bis 2 Jahre ( ) 04
- mehr als 2 Jahre bis 5 Jahre ( ) 05
- mehr als 5 Jahre bis 10 Jahre ( ) 06
- mehr als 10 Jahre bis 15 Jahre ( ) 07
- mehr als 15 Jahre bis 20 Jahre ( ) 08
- mehr als 20 Jahre bis 30 Jahre ( ) 09
- mehr als 30 Jahre bis 40 Jahre ( ) 10
- mehr als 40 Jahre ( ) 11



**SD7** Wie lange sind Sie schon in dem **jetzigen Betrieb oder Amt**?

- weniger als 3 Monate  01
- mehr als 3 Monate bis 6 Monate  02
- mehr als 6 Monate bis 1 Jahr  03
- mehr als 1 Jahr bis 2 Jahre  04
- mehr als 2 Jahre bis 5 Jahre  05
- mehr als 5 Jahre bis 10 Jahre  06
- mehr als 10 Jahre bis 15 Jahre  07
- mehr als 15 Jahre bis 20 Jahre  08
- mehr als 20 Jahre bis 30 Jahre  09
- mehr als 30 Jahre bis 40 Jahre  10
- mehr als 40 Jahre  11

**SD8** Wie lange sind Sie schon an Ihrem **jetzigen Arbeitsplatz**?

- weniger als 3 Monate  01
- mehr als 3 Monate bis 6 Monate  02
- mehr als 6 Monate bis 1 Jahr  03
- mehr als 1 Jahr bis 2 Jahre  04
- mehr als 2 Jahre bis 5 Jahre  05
- mehr als 5 Jahre bis 10 Jahre  06
- mehr als 10 Jahre bis 15 Jahre  07
- mehr als 15 Jahre bis 20 Jahre  08
- mehr als 20 Jahre bis 30 Jahre  09
- mehr als 30 Jahre bis 40 Jahre  10
- mehr als 40 Jahre  11

**QU1** Wie lange dauert die **Berufsausbildung oder Anlernzeit** für Ihre Arbeit?

Stunden     Tage     Wochen     Monate     Jahre  
 (QU1S)                      (QU1T)                      (QU1W)                      QU1M)                      (QU1J)

**QU2** Wie lange braucht man, bis man diese Arbeit **gut beherrscht**?

- bis zu 1 Woche  01
- bis zu 4 Wochen  02
- bis zu 3 Monaten  03
- bis zu ½ Jahr  04
- bis zu ¾ Jahr  05
- bis zu 1 Jahr  06
- bis zu 1½ Jahren  07
- bis zu 2 Jahren  08
- mehr als 2 Jahre  09
- weiß nicht  10

QU3 Wenn Sie Ihre Tätigkeit insgesamt betrachten - **wieviele Qualifikation** verlangt sie?

- sehr wenig ( ) 1
- ziemlich wenig ( ) 2
- etwas ( ) 3
- ziemlich viel ( ) 4
- sehr viel ( ) 5

*Im folgenden werden eine Reihe von Fragen über Ihre Arbeit gestellt. Dabei geht es um die **Arbeitsbedingungen** und **nicht darum**, wie gut oder wie schlecht Sie persönlich die Arbeit verrichten. Stellen Sie sich vor, daß ein Kollege oder eine Kollegin mit dem gleichen Wissen und Können die Fragen genauso beantworten müßte wie Sie.*

AK2 Kollege/in **A** muß bei seiner/ihrer Arbeit sehr **komplizierte** Entscheidungen treffen.  
 Kollege/in **B** muß bei seiner/ihrer Arbeit nur sehr **einfache** Entscheidungen treffen.  
 Welcher der beiden Arbeitsplätze ist Ihrem Arbeitsplatz am ähnlichsten?

- genau wie der von A ( ) 1
- ähnlich wie der von A ( ) 2
- zwischen A und B ( ) 3
- ähnlich wie der von B ( ) 4
- genau wie der von B ( ) 5

AK3 Wie oft erhalten Sie **Aufträge**, die besonders schwierig sind?

- praktisch nie ( ) 1
- ein paar mal im Jahr ( ) 2
- etwa einmal im Monat ( ) 3
- etwa einmal in der Woche ( ) 4
- mehrmals in der Woche ( ) 5

AK4 Können Sie bei Ihrer Arbeit **Neues dazulernen**?

- sehr wenig ( ) 1
- ziemlich wenig ( ) 2
- etwas ( ) 3
- ziemlich viel ( ) 4
- sehr viel ( ) 5

AK7 Kollege/in **A** bearbeitet Aufgaben, bei der er oder sie **genau überlegen** muß, was im einzelnen zu tun ist.  
 Kollege/in **B** bearbeitet Aufgaben, bei denen **sofort klar** ist, was zu tun ist.  
 Welcher der zwei Arbeitsplätze ist Ihrem Arbeitsplatz am ähnlichsten?

- genau wie der von A ( ) 1
- ähnlich wie der von A ( ) 2
- zwischen A und B ( ) 3
- ähnlich wie der von B ( ) 4
- genau wie der von B ( ) 5

AK8 Kollege/in **A** bearbeitet Aufgaben, bei der er oder sie zuerst **genau planen** muß, um die Aufgaben ausführen zu können.

Kollege/in **B** bearbeitet Aufgaben, bei denen **keine Planung erforderlich** ist.

Welcher der zwei Arbeitsplätze ist Ihrem Arbeitsplatz am ähnlichsten?

- genau wie der von A  1
- ähnlich wie der von A  2
- zwischen A und B  3
- ähnlich wie der von B  4
- genau wie der von B  5

HS1 Wenn Sie Ihre Tätigkeit insgesamt betrachten, inwieweit können Sie die **Reihenfolge der Arbeitsschritte** selbst festlegen?

- sehr wenig  1
- ziemlich wenig  2
- etwas  3
- ziemlich viel  4
- sehr viel  5

HS2 Wieviel **Einfluß** haben Sie darauf, welche Arbeit Ihnen **zuteilt** wird?

- sehr wenig  1
- ziemlich wenig  2
- etwas  3
- ziemlich viel  4
- sehr viel  5

HS3 Wenn man Ihre Arbeit insgesamt betrachtet, wieviel **Möglichkeiten zu eigenen Entscheidungen** bietet ihnen Ihre Arbeit?

- sehr wenig  1
- ziemlich wenig  2
- etwas  3
- ziemlich viel  4
- sehr viel  5

HS4 Können Sie selbst bestimmen, **auf welche Art und Weise** Sie Ihre Arbeit erledigen?

- sehr wenig  1
- ziemlich wenig  2
- etwas  3
- ziemlich viel  4
- sehr viel  5

HS7 Inwieweit sind ausschließlich Sie selbst für die **Kontrolle** Ihres **Arbeitsergebnisses** zuständig?

ich bin zuständig für die Kontrolle...

- von allen Arbeitsergebnissen ( ) 1
- von den meisten Arbeitsergebnissen ( ) 2
- von einem Teil der Arbeitsergebnisse ( ) 3
- von wenigen Arbeitsergebnissen ( ) 4
- gar nicht ( ) 5

VA1 A hat Arbeitsaufgaben, die sich häufig **wiederholen**.

**B** hat **viele verschiedene** Arbeitsaufgaben.

Welcher der beiden Arbeitsplätze ist Ihrem Arbeitsplatz am ähnlichsten?

- genau wie der von A ( ) 1
- ähnlich wie der von A ( ) 2
- zwischen A und B ( ) 3
- ähnlich wie der von B ( ) 4
- genau wie der von B ( ) 5

VA2 A muß bei seiner Arbeit mit **vielen verschiedenen Arbeitsmitteln** hantieren.

**B** kommt mit **sehr wenigen Arbeitsmitteln** aus.

Welcher der beiden Arbeitsplätze ist Ihrem Arbeitsplatz am ähnlichsten?

- genau wie der von A ( ) 1
- ähnlich wie der von A ( ) 2
- zwischen A und B ( ) 3
- ähnlich wie der von B ( ) 4
- genau wie der von B ( ) 5

*Im folgenden wollen wir wissen, wieviel Einfluß Sie auf Ihre Arbeitssituation haben.*

| PA                                                                                          | ich habe keinerlei Einflußmöglichkeiten | ich werde nur informiert | ich kann Vorschläge machen | ich werde bei der Entscheidung beteiligt | ich habe großen Einfluß auf die Entscheidung |
|---------------------------------------------------------------------------------------------|-----------------------------------------|--------------------------|----------------------------|------------------------------------------|----------------------------------------------|
| 1. bei der Aufstellung der <b>Urlaubspläne</b>                                              | ( ) 1                                   | ( ) 2                    | ( ) 3                      | ( ) 4                                    | ( ) 5                                        |
| 2. bei der Planung der <b>Arbeitszeit</b> (Schichten und Überstunden)                       | ( ) 1                                   | ( ) 2                    | ( ) 3                      | ( ) 4                                    | ( ) 5                                        |
| 3. auf die <b>Pausengestaltung</b>                                                          | ( ) 1                                   | ( ) 2                    | ( ) 3                      | ( ) 4                                    | ( ) 5                                        |
| 4. auf die Möglichkeiten zur <b>Weiterbildung</b>                                           | ( ) 1                                   | ( ) 2                    | ( ) 3                      | ( ) 4                                    | ( ) 5                                        |
| 5. bei der <b>Einstellung</b> neuer Kollegen/ Kolleginnen                                   | ( ) 1                                   | ( ) 2                    | ( ) 3                      | ( ) 4                                    | ( ) 5                                        |
| 6. bei der <b>Anschaffung</b> neuer Maschinen                                               | ( ) 1                                   | ( ) 2                    | ( ) 3                      | ( ) 4                                    | ( ) 5                                        |
| 7. auf die <b>Ausgestaltung</b> meines Arbeitsplatzes (z.B. Einrichtung des Arbeitszimmers) | ( ) 1                                   | ( ) 2                    | ( ) 3                      | ( ) 4                                    | ( ) 5                                        |

VA 3 Die Arbeit von **A** erfordert nur **zwei bis drei verschiedene Handgriffe**, die immer wiederkommen.

Die Arbeit von **B** umfaßt **viele verschiedene Handgriffe**.

Welcher der beiden Arbeitsplätze ist Ihrem Arbeitsplatz am ähnlichsten?

- genau wie der von A  1
- ähnlich wie der von A  2
- zwischen A und B  3
- ähnlich wie der von B  4
- genau wie der von B  5

VA 4 **A** muß **sehr unterschiedliche Vorgänge oder Arbeitsmaterialien** bearbeiten.

**B** bearbeitet **sehr ähnliche** Arbeitsmaterialien oder Vorgänge.

Welcher der beiden Arbeitsplätze ist Ihrem Arbeitsplatz am ähnlichsten?

- genau wie der von A  1
- ähnlich wie der von A  2
- zwischen A und B  3
- ähnlich wie der von B  4
- genau wie der von B  5

VA6 **A** hat in seiner/ihrer Arbeit sehr viel **Routineaufgaben** zu tun.

In der Arbeit von **B** **wiederholen** sich die Aufgaben nur **wenig**.

Welcher der beiden Arbeitsplätze ist Ihrem Arbeitsplatz am ähnlichsten?

- genau wie der von A  1
- ähnlich wie der von A  2
- zwischen A und B  3
- ähnlich wie der von B  4
- genau wie der von B  5

ZS1 Wie lange können Sie während der Arbeitszeit Ihrem **Arbeitsplatz verlassen**?

- gar nicht  1
- bis zu 5 Minuten  2
- mehr als 5, bis zu 15 Minuten  3
- mehr als 15, bis zu 30 Minuten  4
- mehr als 30 Minuten, bis zu 1 Stunde  5
- mehr als 1 Stunde  6

ZS3 Wie sehr können Sie Ihre **Arbeitsgeschwindigkeit** selbst bestimmen?

- sehr wenig  1
- ziemlich wenig  2
- etwas  3
- ziemlich viel  4
- sehr viel  5

ZS4 Wie lange können Sie sich von Ihrer **Arbeit abwenden** und irgend etwas anderes dazwischenschieben (z.B. eine Pause), ohne mit Ihrer eigentlichen Arbeitsaufgabe in Verzug zu geraten?

- weniger als 5 Minuten am Tag ( ) 1
- mehr als 5, bis zu 10 Minuten am Tag ( ) 2
- mehr als 15, bis zu 30 Minuten am Tag ( ) 3
- mehr als 30 Minuten, bis zu 1 Stunde am Tag ( ) 4
- mehr als 1 Stunde, bis zu 2 Stunden am Tag ( ) 5
- mehr als 2 Stunden am Tag ( ) 6

ZS5 In wieweit können Sie **selbst bestimmen, wie lange** Sie an einer Sache arbeiten?

- sehr wenig ( ) 1
- ziemlich wenig ( ) 2
- etwas ( ) 3
- ziemlich viel ( ) 4
- sehr viel ( ) 5

ZS6 Können Sie Ihren **Arbeitstag selbständig einteilen**?

- sehr wenig ( ) 1
- ziemlich wenig ( ) 2
- etwas ( ) 3
- ziemlich viel ( ) 4
- sehr viel ( ) 5

UN4 Von **wie vielen Leuten** erhalten Sie regelmäßig Anweisungen?

- von keinem Vorgesetzten ( ) 1
- von einem Vorgesetzten ( ) 2
- von zwei Vorgesetzten ( ) 3
- von drei Vorgesetzten ( ) 4
- von mehr als drei Vorgesetzten ( ) 5

UN5 Wie oft erhalten Sie **unklare Anweisungen**?

- sehr selten/nie ( ) 1
- selten (etwa 1 x pro Monat) ( ) 2
- gelegentlich (etwa 1 x pro Woche) ( ) 3
- oft (mehrmals pro Woche) ( ) 4
- sehr oft (ein bis mehrmals täglich) ( ) 5

UN6 Wie oft erhalten Sie von **verschiedenen Vorgesetzten widersprüchliche Anweisungen**?

- sehr selten/nie ( ) 1
- selten (etwa 1 x pro Monat) ( ) 2
- gelegentlich (etwa 1 x pro Woche) ( ) 3
- oft (mehrmals pro Woche) ( ) 4
- sehr oft (ein bis mehrmals täglich) ( ) 5

UN7 Wie oft kommt es vor, daß Sie bei Ihrer Arbeit **Entscheidungen fällen** müssen, **ohne daß ausreichende Information** zur Verfügung steht?

- sehr selten/nie ( ) 1
- selten (etwa 1 x pro Monat) ( ) 2
- gelegentlich (etwa 1 x pro Woche) ( ) 3
- oft (mehrmals pro Woche) ( ) 4
- sehr oft (ein bis mehrmals täglich) ( ) 5

UN8 Manchmal kann man nicht weiterarbeiten, weil **woanders** ein Problem entsteht. Wie oft tritt das bei Ihnen auf?

- sehr selten/nie ( ) 1
- selten (etwa 1 x pro Monat) ( ) 2
- gelegentlich (etwa 1 x pro Woche) ( ) 3
- oft (mehrmals pro Woche) ( ) 4
- sehr oft (ein bis mehrmals täglich) ( ) 5

UG1 Nur wer **viel Erfahrung** hat, kann diese Arbeit **gefährlos** ausführen.

- trifft nicht zu ( ) 1
- trifft kaum zu ( ) 2
- trifft einigermaßen zu ( ) 3
- trifft überwiegend zu ( ) 4
- trifft vollkommen zu ( ) 5

UG2 Wenn man hier bei der Arbeit **nicht sehr vorsichtig** ist, kann **leicht ein Unfall** passieren.

- trifft nicht zu ( ) 1
- trifft kaum zu ( ) 2
- trifft einigermaßen zu ( ) 3
- trifft überwiegend zu ( ) 4
- trifft vollkommen zu ( ) 5

UG3 Um hier **Unfälle** bei der Arbeit zu **vermeiden** braucht man **viel Routine**.

- trifft nicht zu ( ) 1
- trifft kaum zu ( ) 2
- trifft einigermaßen zu ( ) 3
- trifft überwiegend zu ( ) 4
- trifft vollkommen zu ( ) 5

UG4 Man kann diese Arbeit **nur gefährlos** ausüben, wenn man umfangreiche **Sicherheitsvorschriften einhält**.

- trifft nicht zu ( ) 1
- trifft kaum zu ( ) 2
- trifft einigermaßen zu ( ) 3
- trifft überwiegend zu ( ) 4
- trifft vollkommen zu ( ) 5



UG5 Nur wer **genau weiß, wo man besonders aufpassen muß**, kann Unfälle vermeiden.

- trifft nicht zu ( ) 1
- trifft kaum zu ( ) 2
- trifft einigermaßen zu ( ) 3
- trifft überwiegend zu ( ) 4
- trifft vollkommen zu ( ) 5

AOP1 **A** kann die Arbeitsaufträge **gut erledigen**, wenn er/sie sich an die vom Betrieb **vorgesehenen Wege** hält.  
  
**B** kann die Arbeitsaufträge **nur bewältigen**, wenn er/sie **von den** vom Betrieb **vorgesehenen Wegen abweicht**.  
  
Welcher der beiden Arbeitsplätze ist Ihrem am ähnlichsten?

- genau wie der von A ( ) 1
- ähnlich wie der von A ( ) 2
- zwischen A und B ( ) 3
- ähnlich wie der von B ( ) 4
- genau wie der von B ( ) 5

AOP2 **A** hat einen Arbeitsplatz, der im großen und ganzen **so eingerichtet ist**, daß man **gut arbeiten** kann.  
  
**B** hat einen Arbeitsplatz, bei dem er/sie einige Dinge nur schwer erreichen kann und in seinen **Bewegungen oft behindert** ist.  
  
Welcher der beiden Arbeitsplätze ist Ihrem am ähnlichsten?

- genau wie der von A ( ) 1
- ähnlich wie der von A ( ) 2
- zwischen A und B ( ) 3
- ähnlich wie der von B ( ) 4
- genau wie der von B ( ) 5

AOP3 **A** hat Unterlagen und Informationen, die immer **genau stimmen und aktuell** sind.  
  
**B** hat Unterlagen, bei denen Informationen **oft unvollständig und veraltet** sind.  
  
Welcher der beiden Arbeitsplätze ist Ihrem am ähnlichsten?

- genau wie der von A ( ) 1
- ähnlich wie der von A ( ) 2
- zwischen A und B ( ) 3
- ähnlich wie der von B ( ) 4
- genau wie der von B ( ) 5



EBA6 **A wechselt seine Körperhaltung** häufig. (z.B. mal Stehen, mal Sitzen, mal Gehen usw.).

**B arbeitet meistens in derselben Körperhaltung.**

Welchem der beiden Arbeitsplätze ist Ihr Arbeitsplatz am ähnlichsten?

- genau wie der von A  1
- ähnlich wie der von A  2
- zwischen A und B  3
- ähnlich wie der von B  4
- genau wie der von B  5

AUB1 Wie häufig werden Sie durchschnittlich bei Ihrer Arbeit von Ihrem/Ihrer **Vorgesetzten** unterbrochen (z.B. wegen einer Auskunft)?

- sehr selten/nie  1
- selten (etwa 1 x pro Woche)  2
- gelegentlich (etwa 1 x pro Tag)  3
- oft (mehrmals pro Tag)  4
- sehr oft (mehrmals pro Stunde)  5

AUB2 Wie häufig werden Sie durch andere **Kollegen/Mitarbeiter** bei Ihrer Arbeit unterbrochen?

- sehr selten/nie  1
- selten (etwa 1 x pro Woche)  2
- gelegentlich (etwa 1 x pro Tag)  3
- oft (mehrmals pro Tag)  4
- sehr oft (mehrmals pro Stunde)  5

AUB3 Wie häufig werden Sie durch **Kunden** bei Ihrer Arbeit unterbrochen?

- sehr selten/nie  1
- selten (etwa 1 x pro Woche)  2
- gelegentlich (etwa 1 x pro Tag)  3
- oft (mehrmals pro Tag)  4
- sehr oft (mehrmals pro Stunde)  5

UGB1-17 Wie ausgeprägt sind an Ihrem Arbeitsplatz die folgenden Umgebungsfaktoren ?

|                                          | sehr gering/<br>gar nicht | gering | mittel mäßig | groß  | sehr groß |       |
|------------------------------------------|---------------------------|--------|--------------|-------|-----------|-------|
| Lärm                                     | ( ) 1                     | ( ) 2  | ( ) 3        | ( ) 4 | ( ) 5     | UGB1  |
| ungünstige Beleuchtung                   | ( ) 1                     | ( ) 2  | ( ) 3        | ( ) 4 | ( ) 5     | UGB2  |
| unangenehme Temperatur                   | ( ) 1                     | ( ) 2  | ( ) 3        | ( ) 4 | ( ) 5     | UGB3  |
| Blendung                                 | ( ) 1                     | ( ) 2  | ( ) 3        | ( ) 4 | ( ) 5     | UGB4  |
| Schmutz                                  | ( ) 1                     | ( ) 2  | ( ) 3        | ( ) 4 | ( ) 5     | UGB5  |
| Staub/Ruß                                | ( ) 1                     | ( ) 2  | ( ) 3        | ( ) 4 | ( ) 5     | UGB6  |
| giftige Stoffe                           | ( ) 1                     | ( ) 2  | ( ) 3        | ( ) 4 | ( ) 5     | UGB7  |
| unangenehme Gerüche                      | ( ) 1                     | ( ) 2  | ( ) 3        | ( ) 4 | ( ) 5     | UGB8  |
| Zugluft                                  | ( ) 1                     | ( ) 2  | ( ) 3        | ( ) 4 | ( ) 5     | UGB9  |
| Erschütterung/Vibration                  | ( ) 1                     | ( ) 2  | ( ) 3        | ( ) 4 | ( ) 5     | UGB10 |
| Feuchtigkeit / Nässe                     | ( ) 1                     | ( ) 2  | ( ) 3        | ( ) 4 | ( ) 5     | UGB11 |
| Berührung heißer oder kalter Gegenstände | ( ) 1                     | ( ) 2  | ( ) 3        | ( ) 4 | ( ) 5     | UGB12 |
| Witterungseinflüsse                      | ( ) 1                     | ( ) 2  | ( ) 3        | ( ) 4 | ( ) 5     | UGB13 |
| Zigaretten- oder Zigarrenrauch           | ( ) 1                     | ( ) 2  | ( ) 3        | ( ) 4 | ( ) 5     | UGB14 |
| räumliche Enge                           | ( ) 1                     | ( ) 2  | ( ) 3        | ( ) 4 | ( ) 5     | UGB15 |
| trockene Luft                            | ( ) 1                     | ( ) 2  | ( ) 3        | ( ) 4 | ( ) 5     | UGB16 |
| Sonstiges:                               |                           |        |              |       |           | UGB17 |

AUB4 Kommt es vor, daß Sie **aktuelle Arbeiten unterbrechen** müssen, weil etwas wichtiges dazwischen kommt?

- sehr selten/nie ( ) 1
- selten (etwa 1 x pro Woche) ( ) 2
- gelegentlich (etwa 1 x pro Tag) ( ) 3
- oft (mehrmals pro Tag) ( ) 4
- sehr oft (mehrmals pro Stunde) ( ) 5

AUB7 Wie häufig kommt es vor, daß Sie an **mehreren Aufgaben gleichzeitig** arbeiten müssen und zwischen den Arbeitsaufgaben hin und her springen?

- sehr selten/nie ( ) 1
- selten (etwa 1 x pro Woche) ( ) 2
- gelegentlich (etwa 1 x pro Tag) ( ) 3
- oft (mehrmals pro Tag) ( ) 4
- sehr oft (mehrmals pro Stunde) ( ) 5

**KON2** Wie häufig kommt es vor, daß Sie sich bei der Arbeit so **konzentrieren** müssen, **daß Störungen zu zusätzlichem Aufwand führen** (Sie müssen z.B. Zahlen oder Namen noch mal nachschlagen, Werkzeuge noch einmal neu ansetzen oder Berechnungen von vorn machen)?

- sehr selten/nie ( ) 1
- selten (etwa 1 x pro Woche) ( ) 2
- gelegentlich (etwa 1 x pro Tag) ( ) 3
- oft (mehrmals pro Tag) ( ) 4
- ständig ( ) 5

**KON3** Müssen Sie Informationen für kurze Zeit im Kopf behalten, die man sich **schwer merken kann** (z.B. Stückzahlen, Namen, Tabellenschlüssel, Adressen, Dateinamen, Ordner, Register usw.)?

- sehr selten/nie ( ) 1
- selten (etwa 1 x pro Woche) ( ) 2
- gelegentlich (etwa 1 x pro Tag) ( ) 3
- oft (mehrmals pro Tag) ( ) 4
- ständig ( ) 5

**KON4** Wie oft müssen Sie bei Ihrer Arbeit **viele Dinge gleichzeitig im Kopf** haben?

- sehr selten/nie ( ) 1
- selten (etwa 1 x Pro Woche) ( ) 2
- gelegentlich (etwa 1 x Pro Tag) ( ) 3
- oft (mehrmals Pro Tag) ( ) 4
- sehr oft (mehrmals pro Stunde) ( ) 5

**KON5** Kommt es vor, daß Sie eine Zeit lang aufpassen müssen, ohne daß etwas passiert - und dann müssen Sie **sofort reagieren**?

- sehr selten/nie ( ) 1
- selten (etwa 1 x pro Woche) ( ) 2
- gelegentlich (etwa 1 x pro Tag) ( ) 3
- oft (mehrmals pro Tag) ( ) 4
- sehr oft (mehrmals pro Stunde) ( ) 5

**KON6** Wie oft gibt es Momente bei Ihrer Arbeit, die **für kurze Zeit höchste Konzentration** erfordern?

- sehr selten/nie ( ) 1
- selten (etwa 1 x pro Woche) ( ) 2
- gelegentlich (etwa 1 x pro Tag) ( ) 3
- oft (mehrmals pro Tag) ( ) 4
- sehr oft (mehrmals pro Stunde) ( ) 5

**ZD1** Wie häufig stehen Sie unter **Zeitdruck**?

- sehr selten/nie ( ) 1
- selten (etwa 1 x pro Woche) ( ) 2
- gelegentlich (etwa 1 x pro Tag) ( ) 3
- oft (mehrmals pro Tag) ( ) 4
- sehr oft (fast ununterbrochen) ( ) 5

ZD2 Wie häufig passiert es, daß Sie **schneller arbeiten**, als sie es normalerweise tun, um die Arbeit zu schaffen?

- |                                 |       |
|---------------------------------|-------|
| sehr selten/nie                 | ( ) 1 |
| selten (etwa 1 x pro Woche)     | ( ) 2 |
| gelegentlich (etwa 1 x pro Tag) | ( ) 3 |
| oft (mehrmals pro Tag)          | ( ) 4 |
| sehr oft (fast ununterbrochen)  | ( ) 5 |

ZD3 Wie oft kommt es vor, daß Sie wegen zuviel Arbeit **nicht oder verspätet in die Pause** gehen können?

- |                                   |       |
|-----------------------------------|-------|
| sehr selten/nie                   | ( ) 1 |
| selten (etwa 1 x pro Monat)       | ( ) 2 |
| gelegentlich (etwa 1 x pro Woche) | ( ) 3 |
| oft (mehrmals pro Woche)          | ( ) 4 |
| sehr oft (täglich)                | ( ) 5 |

ZD4 Wie oft kommt es vor, daß Sie wegen zuviel Arbeit **verspätet in den Feierabend** gehen können?

- |                                   |       |
|-----------------------------------|-------|
| sehr selten/nie                   | ( ) 1 |
| selten (etwa 1 x pro Monat)       | ( ) 2 |
| gelegentlich (mehrmals pro Monat) | ( ) 3 |
| oft (mehrmals pro Woche)          | ( ) 4 |
| sehr oft (fast täglich)           | ( ) 5 |

ZD6 Wie oft wird bei Ihrer Arbeit ein **hohes Arbeitstempo** verlangt?

- |                                 |       |
|---------------------------------|-------|
| sehr selten/nie                 | ( ) 1 |
| selten (etwa 1 x pro Woche)     | ( ) 2 |
| gelegentlich (etwa 1 x pro Tag) | ( ) 3 |
| oft (mehrmals pro Tag)          | ( ) 4 |
| sehr oft (mehrmals pro Stunde)  | ( ) 5 |

Im folgenden geht es darum, wie gut Sie mit anderen Personen Kontakt aufnehmen, jemandem helfen oder sich mit anderen unterhalten können. Es sollen dabei **räumliche, technische** oder **organisatorische Gründe** bedacht werden, die das fördern oder behindern können, **nicht jedoch soziale Gründe** (man kann jemanden nicht leiden und möchte deshalb keinen Kontakt) oder fachliche Gründe (man hat nicht die entsprechenden Kenntnisse um jemandem zu helfen).

KOM1 Mit wie vielen **verschiedenen Kollegen(innen)** können Sie während der Arbeit **Kontakt aufnehmen** (z.B. um sich mit ihnen über private oder dienstliche Dinge zu unterhalten) ?

- |                          |       |
|--------------------------|-------|
| mit keiner Person        | ( ) 1 |
| mit 1 - 2 Personen       | ( ) 2 |
| mit 3 - 5 Personen       | ( ) 3 |
| mit 6 - 10 Personen      | ( ) 4 |
| mit mehr als 10 Personen | ( ) 5 |

KOM2 Mit wie vielen **anderen Personen** (z.B. Kunden) haben Sie an einem Arbeitstag durchschnittlich **Kontakt**?

- mit keiner Person ( ) 1
- mit 1 - 2 Personen ( ) 2
- mit 3 - 5 Personen ( ) 3
- mit 6 - 10 Personen ( ) 4
- mit mehr als 10 Personen ( ) 5

KOM3 Können Sie sich während der Arbeit mit Ihren Kollegen/innen über **Dinge unterhalten, die nichts mit der Arbeit zu tun haben?**

- ja, ohne Schwierigkeiten ( ) 1
- ja, mit geringen Schwierigkeiten ( ) 2
- mit einigen Schwierigkeiten ( ) 3
- mit ziemlichen Schwierigkeiten ( ) 4
- die Arbeit läßt es praktisch nicht zu ( ) 5

KSP3 **A** kann in der Regel **selbst entscheiden**, mit welchen Kollegen/innen er oder sie zusammenarbeitet.

Bei **B** ist immer **genau vorgegeben**, mit wem er oder sie jeweils zusammenarbeitet.

Welcher der beiden Arbeitsplätze ist Ihrem am ähnlichsten?

- genau wie der von A ( ) 1
- ähnlich wie der von A ( ) 2
- zwischen A und B ( ) 3
- ähnlich wie der von B ( ) 4
- genau wie der von B ( ) 5
- ich arbeite mit niemandem zusammen ( ) 9

KSP4 Wenn **A** mit einem Kollegen/Kollegin in der Zusammenarbeit nicht klar kommt, dann kann er/sie in Zukunft **mit jemand anderem zusammenarbeiten**.

Wenn **B** mit einem Kollegen/Kollegin in der Zusammenarbeit nicht klar kommt, muß er/sie **trotzdem weiter mit diesem Kollegen/Kollegin zusammenarbeiten**.

Welcher der beiden Arbeitsplätze ist ihrem am ähnlichsten?

- genau wie der von A ( ) 1
- ähnlich wie der von A ( ) 2
- zwischen A und B ( ) 3
- ähnlich wie der von B ( ) 4
- genau wie der von B ( ) 5
- ich arbeite mit niemandem zusammen ( ) 9

KSP5 A kann in der Regel **selber entscheiden**, ob er/sie eine Arbeit **alleine oder zusammen mit Kollegen/innen** ausführen will.

Bei **B** ist **vorgegeben** ob er/sie eine Arbeit alleine oder zusammen mit Kollegen ausführt.

Welcher der beiden Arbeitsplätze ist ihrem am ähnlichsten?

- genau wie der von A  1
- ähnlich wie der von A  2
- zwischen A und B  3
- ähnlich wie der von B  4
- genau wie der von B  5
  
- ich arbeite mit niemandem zusammen  9

KOP1 Wie stark sind Sie bei Ihrer Arbeit davon **abhängig, wie schnell oder wie langsam** Ihre **Kollegen/innen** arbeiten?

- gar nicht  1
- wenig  2
- einigermaßen  3
- viel  4
- sehr viel  5

KOP2 Wie stark sind Sie bei Ihrer Arbeit davon **abhängig wie gut oder wie schlecht** Ihre **Kollegen/innen** arbeiten?

- gar nicht  1
- wenig  2
- einigermaßen  3
- viel  4
- sehr viel  5

KOP3 Wenn **A** einen **Fehler** bei der Arbeit macht, dann **wirkt sich dies unmittelbar auf seine/ihre Kolleginnen oder Kollegen** aus.

Wenn **B** einen **Fehler** bei der Arbeit macht, dann hat das **keine Folgen für Kollegen/innen**, sondern wirkt sich **nur auf sie/ihn selbst** aus.

Welcher der beiden Arbeitsplätze ist ihrem am ähnlichsten?

- genau wie der von A  1
- ähnlich wie der von A  2
- zwischen A und B  3
- ähnlich wie der von B  4
- genau wie der von B  5



KOP7 Wie stark sind Ihre Kollegen/innen von **Ihrem Arbeitstempo** abhängig?

- gar nicht ( ) 1
- wenig ( ) 2
- einigermaßen ( ) 3
- viel ( ) 4
- sehr viel ( ) 5

KOP8 Wie stark sind Ihre Kollegen/innen davon abhängig **wie gut oder schlecht Sie** arbeiten?

- gar nicht ( ) 1
- wenig ( ) 2
- einigermaßen ( ) 3
- viel ( ) 4
- sehr viel ( ) 5

**Die folgenden Fragen brauchen Sie nur zu beantworten, wenn Sie mit jemandem zusammenarbeiten, kreuzen Sie bitte die folgende Frage an. Der Fragebogen ist damit für Sie beendet.**

**KER0: Ich arbeite mit niemanden zusammen ( )**

KER1 Komplizierte Entscheidungen muß man hier

- überwiegend gemeinsam fällen ( ) 1
- eher gemeinsam fällen ( ) 2
- mal alleine, mal gemeinsam fällen ( ) 3
- eher alleine fällen ( ) 4
- kommen nicht vor ( ) 5

KER2 Inwieweit erfordert Ihre Arbeit eine **gemeinsame Planung** mit Ihren Kollegen/innen?

- sehr stark ( ) 1
- stark ( ) 2
- mittel ( ) 3
- wenig ( ) 4
- sehr wenig, gar nicht ( ) 5

KER3 Inwieweit erfordert Ihre Arbeit, daß Sie genau wissen, **wie weit die anderen** gerade sind?

- sehr wenig/gar nicht ( ) 1
- wenig ( ) 2
- einigermaßen ( ) 3
- ziemlich ( ) 4
- sehr ( ) 5

KER4 Inwieweit müssen andere genau wissen, **wie weit Sie** gerade mit der Arbeit sind?

- sehr wenig/gar nicht ( ) 1
- wenig ( ) 2
- einigermaßen ( ) 3
- ziemlich ( ) 4
- sehr ( ) 5

## **D The ISTA – Instrument – English Version**

# **ISTA**

## **Instrument for Stress-related Job Analysis**

**Authors: Semmer, N.; Zapf, D.; Dunckel, H.**

**Version 6.0**

**Bern, Frankfurt, Flensburg: May, 1998**

## ISTA - Instrument for stress-related job analysis

Authors: Semmer, N.; Zapf, D.; Dunckel, H.  
Version 6.0  
Bern, Frankfurt, Flensburg: Mai 1998

### Sources

- Semmer, N. (1984). **Stressbezogene Tätigkeitsanalyse**. Weinheim und Basel: Beltz.
- Semmer, N., Dunckel, H. (1991). Stressbezogene Arbeitsanalyse. In S. Greif, E. Bamberg, & N. Semmer (Hrsg.) **Psychischer Stress am Arbeitsplatz** (S. 57-90). Göttingen: Hogrefe.
- Semmer, N.K., Zapf, D., & Dunckel, H. (1998). Instrument zur streßbezogenen Tätigkeitsanalyse ISTA. In H. Dunckel (Hrsg.). **Handbuch der Instrumente zur Arbeitsanalyse**. Zürich: Verlag der Fachvereine Hochschulverlag.
- Zapf, D. (1991). Stressbezogene Arbeitsanalyse bei der Arbeit mit unterschiedlichen Bürosoftwaresystemen. **Zeitschrift für Arbeits- und Organisationspsychologie**, 35, 2-14.
- Zapf, D., Bamberg, E., Dunckel, H., Frese, M., Greif, S., Mohr, G., Rückert, D. & Semmer, N. (1983). **Dokumentation der Skalen des Forschungsprojekts "Psychischer Stress am Arbeitsplatz - hemmende und fördernde Bedingungen für humanere Arbeitsplätze"**. Vervielfältigtes Manuskript: Universität Osnabrück.

### ISTA –includes the following scales:

|                                   |                         |                                     |                         |
|-----------------------------------|-------------------------|-------------------------------------|-------------------------|
| <i>Sociodemographical data:</i>   | SD1 - SD8               | <i>Concentration requirements:</i>  | KON2 - KON6             |
| <i>Required qualifications:</i>   | QU1 - QU3               | <i>Time pressure</i>                | ZD1 – ZD4, ZD6          |
| <i>Complexity:</i>                | AK2, AK3, AK4, AK7, AK8 | <i>Communication possibilities:</i> | KOM1 – KOM3             |
| <i>Task control</i>               | HS1 – HS4, HS7          | <i>Cooperation possibilities</i>    | KSP3- KSP5              |
| <i>Participation:</i>             | PA1 - PA7               | <i>Cooperation narrowness</i>       | KOP1 – KOP3, KOP7, KOP8 |
| <i>Variability:</i>               | VA1 - VA4, VA6          | <i>Cooperation requirements:</i>    | KER1 -KER4              |
| <i>Time control:</i>              | ZS1 ZS3 – ZS6           |                                     |                         |
| <i>Uncertainty:</i>               | UN4 – UN8               |                                     |                         |
| <i>Accident risk:</i>             | UG1 - UG5               |                                     |                         |
| <i>Performance Constraints:</i>   | AOP1 – AOP4, AOP8       |                                     |                         |
| <i>One-sided physical demands</i> | EBA1 EBA6               |                                     |                         |
| <i>nvironmental stressors:</i>    | UGB1 - UGB17            |                                     |                         |
| <i>Work interruptions:</i>        | AUB1 – AUB4, AUB7       |                                     |                         |

SD1 How old are you?

\_\_\_\_\_ year(s)

SD2 Gender

Female ( ) 1                      Male ( ) 2

SD3 Which educational level have you attained?

Great Britain  
 Unfinished secondary school ( ) 1  
 Completed secondary school ( ) 2  
 Grammar school ( ) 3  
 A Levels ( ) 4  
 Technical college ( ) 5  
 Advanced technical college ( ) 6  
 University degree ( ) 7

USA  
 Junior high school without graduation ( ) 1  
 Junior high school with graduation ( ) 2  
 High school ( ) 3  
 High school with graduation ( ) 4  
 Technical college ( ) 5  
 Advanced technical college ( ) 6  
 University degree ( ) 7

SD4 Which level of professional training have you attained?

No training ( ) 1  
 Completed vocational training ( ) 2  
 Master craftsmanship ( ) 3  
 Diploma, Master, Bachelor ( ) 4

In case of multiple qualifications, please indicate the highest level!

SD5 Which level of professional training have you attained in relation to your current occupation?

No training ( ) 1  
 Completed vocational training ( ) 2  
 Master craftsmanship ( ) 3  
 Diploma, Master, Bachelor ( ) 4

In case of multiple qualifications, please indicate the highest level!

**SD6** How long have you been doing paid work?

- less than 3 months ( ) 01
- from 3 to 6 months ( ) 02
- from 6 months to 1 year ( ) 03
- from 1 to 2 years ( ) 04
- from 2 to 5 years ( ) 05
- from 5 to 10 years ( ) 06
- from 10 to 15 years ( ) 07
- from 15 to 20 years ( ) 08
- from 20 to 30 years ( ) 09
- from 30 to 40 years ( ) 10
- over 40 years ( ) 11

**SD7** How long have you been working in your present company or department?

- less than 3 months ( ) 01
- from 3 to 6 months ( ) 02
- from 6 months to 1 year ( ) 03
- from 1 to 2 years ( ) 04
- from 2 to 5 years ( ) 05
- from 5 to 10 years ( ) 06
- from 10 to 15 years ( ) 07
- from 15 to 20 years ( ) 08
- from 20 to 30 years ( ) 09
- from 30 to 40 years ( ) 10
- over 40 years ( ) 11

**SD8** How long have you been working in your present job?

- less than 3 months ( ) 01
- from 3 to 6 months ( ) 02
- from 6 months to 1 year ( ) 03
- from 1 to 2 years ( ) 04
- from 2 to 5 years ( ) 05
- from 5 to 10 years ( ) 06
- from 10 to 15 years ( ) 07
- from 15 to 20 years ( ) 08
- from 20 to 30 years ( ) 09
- from 30 to 40 years ( ) 10
- over 40 years ( ) 11

**QU1** What amount of training does your work require?

\_\_\_\_\_ hours    \_\_\_\_\_ days    \_\_\_\_\_ weeks    \_\_\_\_\_ months    \_\_\_\_\_ years (QU1S)  
 (QU1T) (QU1W)                      QU1M)                      (QU1J)

QU2 How much time is needed to achieve mastery regarding your tasks?

- up to 1 week ( ) 01
- up to 4 weeks ( ) 02
- up to 3 months ( ) 03
- up to ½ year ( ) 04
- up to ¾ year ( ) 05
- up to 1 year ( ) 06
- up to 1 ½ years ( ) 07
- up to 2 years ( ) 08
- more than 2 years ( ) 09
- don't know ( ) 10

QU3 If you think about your work activity in general – how much qualification is required?

- very little ( ) 1
- rather little ( ) 2
- somewhat ( ) 3
- rather a lot ( ) 4
- very much ( ) 5



*The following section consists of a series of questions about your work activities. They concern the conditions at work, not the quality of your performance. Imagine that a colleague possessing the same knowledge and skill must answer the following questions exactly as you do.*

AK2 Person A must make very complex decisions in the course of her/his work.  
 Person B must make only simple decisions in the course of her/his work.  
 Which of the above mostly resembles your job?

- exactly like A ( ) 1
- rather like A ( ) 2
- between A and B ( ) 3
- rather like B ( ) 4
- exactly like B ( ) 5

AK3 Do you receive special tasks that are unusual and particularly difficult?

- almost never ( ) 1
- a few times a year ( ) 2
- about once a month ( ) 3
- about once a week ( ) 4
- several times a week ( ) 5

AK4 Does your work allow you to learn something new?

- very little ( ) 1
- rather little ( ) 2
- somewhat ( ) 3
- rather a lot ( ) 4
- very much ( ) 5

AK7 Person A works on tasks where one has to consider very carefully how to proceed.  
 Person B works on tasks for which the way to proceed is exactly clear from the start.  
 Which of the above work mostly resembles your job?

- exactly like A ( ) 1
- rather like A ( ) 2
- between A and B ( ) 3
- rather like B ( ) 4
- exactly like B ( ) 5

AK8 Person A works on tasks, the execution of which has to be planned in advance.  
 Person B works on tasks that do not require planning ahead.  
 Which of the above work mostly resembles your job?

- exactly like A ( ) 1
- rather like A ( ) 2
- between A and B ( ) 3
- rather like B ( ) 4
- exactly like B ( ) 5

HS1 Overall, with regard to your work, how much can you change the sequence of the different steps yourself?

- to a very small degree ( ) 1
- to a small degree ( ) 2
- somewhat ( ) 3
- to a large degree ( ) 4
- to a very large degree ( ) 5

HS2 How much influence do you have on the work that is assigned to you?

- very little ( ) 1
- rather little ( ) 2
- somewhat ( ) 3
- rather a lot ( ) 4
- very much ( ) 5

HS3 Overall, regarding your work, how much opportunity is there for you to make your own decisions?

- very little ( ) 1
- rather little ( ) 2
- somewhat ( ) 3
- rather a lot ( ) 4
- very much ( ) 5

HS4 Can you decide yourself which way to carry out your work?

- very little ( ) 1
- rather little ( ) 2
- somewhat ( ) 3
- rather a lot ( ) 4
- very much ( ) 5

HS7 To what extent are you the only one responsible to check your work?

It is my responsibility to check ...

- All work outcomes ( ) 1
- most work outcomes ( ) 2
- some work outcomes ( ) 3
- few work outcomes ( ) 4
- no work outcomes ( ) 5

VA1 In general, person A receives recurrent and similar tasks.  
 In general, person B receives tasks that are varied and different.  
 Which of the above mostly resembles your job?

- exactly like A ( ) 1
- rather like A ( ) 2
- between A and B ( ) 3
- rather like B ( ) 4
- exactly like B ( ) 5

VA2 While working, person A must handle many different materials.

While working, person B has to work with a few materials.

Which of the above mostly resembles your job?

- exactly like A ( ) 1
- rather like A ( ) 2
- between A and B ( ) 3
- rather like B ( ) 4
- exactly like B ( ) 5

The following concerns the degree to which you can influence your work situation.

| PA                                                               | I have no influence on decisions | I am only informed | I can make suggestions | I am involved in the decision process | I can greatly influence the decision |
|------------------------------------------------------------------|----------------------------------|--------------------|------------------------|---------------------------------------|--------------------------------------|
| 1. planning vacation schedules                                   | ( ) 1                            | ( ) 2              | ( ) 3                  | ( ) 4                                 | ( ) 5                                |
| 2. planning work schedules (shifts and overtime)                 | ( ) 1                            | ( ) 2              | ( ) 3                  | ( ) 4                                 | ( ) 5                                |
| 3. the arrangement of work breaks                                | ( ) 1                            | ( ) 2              | ( ) 3                  | ( ) 4                                 | ( ) 5                                |
| 4. the possibilities of further training                         | ( ) 1                            | ( ) 2              | ( ) 3                  | ( ) 4                                 | ( ) 5                                |
| 5. the selection of new colleagues                               | ( ) 1                            | ( ) 2              | ( ) 3                  | ( ) 4                                 | ( ) 5                                |
| 6. purchasing of new machines                                    | ( ) 1                            | ( ) 2              | ( ) 3                  | ( ) 4                                 | ( ) 5                                |
| 7. the design of your workplace (e.g. furnishing of your office) | ( ) 1                            | ( ) 2              | ( ) 3                  | ( ) 4                                 | ( ) 5                                |

VA 3 Person A has to perform a limited number of manual operations, which are repeated over and over.  
 Person B performs many different manual operations during their work activity.  
 Which of the above mostly resembles your job?

- exactly like A ( ) 1
- rather like A ( ) 2
- between A and B ( ) 3
- rather like B ( ) 4
- exactly like B ( ) 5

VA 4 Person A must work with very different procedures or materials.  
 Person B must work with materials that are very similar to each other.  
 Which of the mostly resembles your job?

- exactly like A ( ) 1
- rather like A ( ) 2
- between A and B ( ) 3
- rather like B ( ) 4
- exactly like B ( ) 5

VA6 Person A must perform many routine tasks.  
 In person B's work there are few recurrent tasks.  
 Which of the above mostly resembles your job?

- exactly like A ( ) 1
- rather like A ( ) 2
- between A and B ( ) 3
- rather like B ( ) 4
- exactly like B ( ) 5

ZS1 For how long is it possible for you to leave your workplace during working hours?

- Not at all ( ) 1
- for 5 minutes ( ) 2
- between 5 and 15 minutes ( ) 3
- between 15 and 30 minutes ( ) 4
- between 30 minutes and 1 hour ( ) 5
- for more than 1 hour ( ) 6

ZS3 To what degree is it possible for you to set your own work pace?

- very little ( ) 1
- rather little ( ) 2
- somewhat ( ) 3
- rather a lot ( ) 4
- very much ( ) 5

ZS4 How long is it possible for you to put aside work and to occupy yourself with other things (i.e., take a break) without falling behind in your work?

- Less than 5 minutes a day ( ) 1
- between 5 and 10 minutes a day ( ) 2
- between 10 and 30 minutes a day ( ) 3
- between 30 minutes and 1 hour a day ( ) 4
- between 1 and 2 hours a day ( ) 5
- more than 2 hours a day ( ) 6

ZS5 To what degree are you able to decide how long you will be working on a certain task?

- to a very small degree ( ) 1
- to a small degree ( ) 2
- somewhat ( ) 3
- to a large degree ( ) 4
- to a very large degree ( ) 5

ZS6 To what extent are you able to plan your work day yourself?

- very little ( ) 1
- rather little ( ) 2
- somewhat ( ) 3
- rather a lot ( ) 4
- very much ( ) 5

UN4 From how many people do you get instructions regularly?

- from no supervisor ( ) 1
- from one supervisor ( ) 2
- from two supervisors ( ) 3
- from three supervisors ( ) 4
- from more than 3 supervisors ( ) 5

UN5 How often do you receive unclear instructions?

- very rarely/never ( ) 1
- rarely (approximately once a month) ( ) 2
- occasionally (approximately once a week) ( ) 3
- often (several times a week) ( ) 4
- very often (once or several times a day) ( ) 5

UN6 How often do you receive contradictory instructions from different supervisors?

- very rarely/never ( ) 1
- rarely (approximately once a month) ( ) 2
- occasionally (approximately once a week) ( ) 3
- often (several times a week) ( ) 4
- very often (once or several times a day) ( ) 5

UN7 How often do you have to make decisions for which the necessary information is unavailable?

- very rarely/never ( ) 1
- rarely (approximately once a month) ( ) 2
- occasionally (approximately once a week) ( ) 3
- often (several times a week) ( ) 4
- very often (once or several times a day) ( ) 5

UN8 How often are you in a situation where you cannot go on with your work because of a problem in another area?

- very rarely/never ( ) 1
- rarely (approximately once a month) ( ) 2
- occasionally (approximately once a week) ( ) 3
- often (several times a week) ( ) 4
- very often (once or several times a day) ( ) 5

UG1 Only very experienced people are able to accomplish this work in a safe way.

- not at all correct ( ) 1
- rather not correct ( ) 2
- somewhat correct ( ) 3
- rather correct ( ) 4
- mostly correct ( ) 5

UG2 Unless one is **very** careful while performing this work, an accident can easily occur.

- not at all correct ( ) 1
- rather not correct ( ) 2
- somewhat correct ( ) 3
- rather correct ( ) 4
- mostly correct ( ) 5

UG3 To prevent an accident from occurring, a lot of experience is necessary.

- not at all correct ( ) 1
- rather not correct ( ) 2
- somewhat correct ( ) 3
- rather correct ( ) 4
- mostly correct ( ) 5

UG4 One can perform this work without danger only when following the safety rules.

- not at all correct ( ) 1
- rather not correct ( ) 2
- somewhat correct ( ) 3
- rather correct ( ) 4
- mostly correct ( ) 5

UG5 Only someone who knows exactly where to be especially careful will be able to avoid accidents.

- not at all correct ( ) 1
- rather not correct ( ) 2
- somewhat correct ( ) 3
- rather correct ( ) 4
- mostly correct ( ) 5

AOP1 Person **A** is able to perform his/her assignments well if he/she follows departmental policy.  
 Person **B** is able to perform his/her assignments only when he/she deviates from departmental policy.  
 Which of the above mostly resembles your job?

- exactly like A ( ) 1
- rather like A ( ) 2
- between A and B ( ) 3
- rather like B ( ) 4
- exactly like B ( ) 5

AOP2 In general, person **A**'s workplace is arranged to facilitate work.  
 Person **B**'s workplace is arranged in such a way that certain objects are difficult to reach and movements are restricted.  
 Which of the above mostly resembles your job?

- exactly like A ( ) 1
- rather like A ( ) 2
- between A and B ( ) 3
- rather like B ( ) 4
- exactly like B ( ) 5

AOP3 **A** has documents and information at his/her disposal that are always accurate and up to date.  
**B** has to work with documents that often contain incomplete and obsolete information.  
 Which of the above mostly resembles your job?

- exactly like A ( ) 1
- rather like A ( ) 2
- between A and B ( ) 3
- rather like B ( ) 4
- exactly like B ( ) 5

AOP4 **A** must spend a lot of time to get information and/or materials to pursue his/her work activity.  
**B** always has the necessary information and/or materials at his/her disposal.  
 Which of the above work resembles your job?

- exactly like A ( ) 1
- rather like A ( ) 2
- between A and B ( ) 3
- rather like B ( ) 4
- exactly like B ( ) 5

AOP8 A must work with materials and/or equipment that are not suitable for use.  
 B works with faultless work materials and/or equipment.  
 Which of the above work activities mostly resembles yours?

- exactly like A ( ) 1
- rather like A ( ) 2
- between A and B ( ) 3
- rather like B ( ) 4
- exactly like B ( ) 5

EBA1 To what degree does your work activity vary physically?

- to a very small degree ( ) 1
- to a small degree ( ) 2
- somewhat ( ) 3
- to a large degree ( ) 4
- to a very large degree ( ) 5

EBA 2-3 How often does your work activity require you to...

|                         | <b>Very rarely/<br/>never</b> | <b>Rarely</b> | <b>Some-<br/>times</b> | <b>Often</b> | <b>Very often/<br/>constantly</b> |      |
|-------------------------|-------------------------------|---------------|------------------------|--------------|-----------------------------------|------|
|                         | <b>1</b>                      | <b>2</b>      | <b>3</b>               | <b>4</b>     | <b>5</b>                          |      |
| bend from the waist     | ( )                           | ( )           | ( )                    | ( )          | ( )                               | EBA2 |
| take an awkward posture | ( )                           | ( )           | ( )                    | ( )          | ( )                               | EBA3 |

EBA4-5 How typical is ... in your work activity?

|                                   | <b>Very<br/>untypical</b> | <b>Rather<br/>untypical</b> | <b>somewhat</b> | <b>Rather<br/>typical</b> | <b>Very<br/>typical</b> |      |
|-----------------------------------|---------------------------|-----------------------------|-----------------|---------------------------|-------------------------|------|
|                                   | <b>1</b>                  | <b>2</b>                    | <b>3</b>        | <b>4</b>                  | <b>5</b>                |      |
| sitting for long periods of time  | ( )                       | ( )                         | ( )             | ( )                       | ( )                     | EBA4 |
| standing for long periods of time | ( )                       | ( )                         | ( )             | ( )                       | ( )                     | EBA5 |

EBA6 A changes his posture often (e.g. sometimes standing, sometimes sitting, sometimes walking etc.)  
 B works mostly in the same posture.  
 Which of the above mostly resembles your job?

- exactly like A ( ) 1
- rather like A ( ) 2
- between A and B ( ) 3
- rather like B ( ) 4
- exactly like B ( ) 5



AUB1 On average, how often are you interrupted by your supervisor during your work? (e.g., for an inquiry)

- very rarely/never ( ) 1
- rarely (approximately once a week) ( ) 2
- occasionally (approximately once a day) ( ) 3
- often (several times a day) ( ) 4
- very often (several times an hour) ( ) 5

AUB2 How often are you interrupted by colleagues during your work?

- very rarely/never ( ) 1
- rarely (approximately once a week) ( ) 2
- occasionally (approximately once a day) ( ) 3
- often (several times a day) ( ) 4
- very often (several times an hour) ( ) 5

AUB3 How often are you interrupted by clients during your work?

- very rarely/never ( ) 1
- rarely (approximately once a week) ( ) 2
- occasionally (approximately once a day) ( ) 3
- often (several times a day) ( ) 4
- very often (several times an hour) ( ) 5

UGB1-17 How strong are the following environmental factors in your workplace?

|                                  | <b>Very low/<br/>none at all</b> | <b>Low</b> | <b>Some-what</b> | <b>Intense</b> | <b>Very intense</b> |       |
|----------------------------------|----------------------------------|------------|------------------|----------------|---------------------|-------|
| Noise                            | ( ) 1                            | ( ) 2      | ( ) 3            | ( ) 4          | ( ) 5               | UGB1  |
| Poor Lighting                    | ( ) 1                            | ( ) 2      | ( ) 3            | ( ) 4          | ( ) 5               | UGB2  |
| Unpleasant Temperature           | ( ) 1                            | ( ) 2      | ( ) 3            | ( ) 4          | ( ) 5               | UGB3  |
| Blinding                         | ( ) 1                            | ( ) 2      | ( ) 3            | ( ) 4          | ( ) 5               | UGB4  |
| Dirt                             | ( ) 1                            | ( ) 2      | ( ) 3            | ( ) 4          | ( ) 5               | UGB5  |
| Dust/Soot                        | ( ) 1                            | ( ) 2      | ( ) 3            | ( ) 4          | ( ) 5               | UGB6  |
| Poisonous Materials              | ( ) 1                            | ( ) 2      | ( ) 3            | ( ) 4          | ( ) 5               | UGB7  |
| Unpleasant Smells                | ( ) 1                            | ( ) 2      | ( ) 3            | ( ) 4          | ( ) 5               | UGB8  |
| Draft                            | ( ) 1                            | ( ) 2      | ( ) 3            | ( ) 4          | ( ) 5               | UGB9  |
| Vibrations                       | ( ) 1                            | ( ) 2      | ( ) 3            | ( ) 4          | ( ) 5               | UGB10 |
| Dampness/Wetness                 | ( ) 1                            | ( ) 2      | ( ) 3            | ( ) 4          | ( ) 5               | UGB11 |
| Contact with hot or cold objects | ( ) 1                            | ( ) 2      | ( ) 3            | ( ) 4          | ( ) 5               | UGB12 |
| Influence of weather conditions  | ( ) 1                            | ( ) 2      | ( ) 3            | ( ) 4          | ( ) 5               | UGB13 |
| Cigarette or cigar smoke         | ( ) 1                            | ( ) 2      | ( ) 3            | ( ) 4          | ( ) 5               | UGB14 |
| Restricted work space            | ( ) 1                            | ( ) 2      | ( ) 3            | ( ) 4          | ( ) 5               | UGB15 |
| Dry air                          | ( ) 1                            | ( ) 2      | ( ) 3            | ( ) 4          | ( ) 5               | UGB16 |
| Other:                           |                                  |            |                  |                |                     | UGB17 |

AUB4 Do you often have to interrupt your work because something important comes up?

- very rarely/never ( ) 1
- rarely (approximately once a week) ( ) 2
- occasionally (approximately once a day) ( ) 3
- often (several times a day) ( ) 4
- very often (several times an hour) ( ) 5

AUB7 How often does it occur that you must work at several tasks simultaneously, jumping back and forth between these tasks?

- very rarely/never ( ) 1
- rarely (approximately once a week) ( ) 2
- occasionally (approximately once a day) ( ) 3
- often (several times a day) ( ) 4
- very often (several times an hour) ( ) 5

KON2 How often do you have to concentrate on your work to such a degree that interruptions create extra effort (e.g., you must look up numbers or names again, recollaborate tools, or start calculations all over again)?

- very rarely/never ( ) 1
- rarely (approximately once a week) ( ) 2
- occasionally (approximately once a day) ( ) 3
- often (several times a day) ( ) 4
- very often (several times an hour) ( ) 5

KON3 How often must you retain information that is difficult to remember? (e.g., quantities, names, telephone numbers, addresses, file names, registers etc.)

- very rarely/never ( ) 1
- rarely (approximately once a week) ( ) 2
- occasionally (approximately once a day) ( ) 3
- often (several times a day) ( ) 4
- very often (several times an hour) ( ) 5

KON4 How often must you remember many things simultaneously?

- very rarely/never ( ) 1
- rarely (approximately once a week) ( ) 2
- occasionally (approximately once a day) ( ) 3
- often (several times a day) ( ) 4
- very often (several times an hour) ( ) 5

KON5 How often do you have to be attentive for long periods of time without anything happening, and then you must react rapidly?

- very rarely/never ( ) 1
- rarely (approximately once a week) ( ) 2
- occasionally (approximately once a day) ( ) 3
- often (several times a day) ( ) 4
- very often (several times an hour) ( ) 5

KON6 How often does your work require the utmost concentration for short time periods?

- very rarely/never ( ) 1
- rarely (approximately once a week) ( ) 2
- occasionally (approximately once a day) ( ) 3
- often (several times a day) ( ) 4
- very often (several times an hour) ( ) 5

ZD1 How often are you pressed for time?

- very rarely/never ( ) 1
- rarely (approximately once a week) ( ) 2
- occasionally (approximately once a day) ( ) 3
- often (several times a day) ( ) 4
- very often (several times an hour) ( ) 5

ZD2 How often do you have to work faster than normal in order to complete your work?

- very rarely/never ( ) 1
- rarely (approximately once a week) ( ) 2
- occasionally (approximately once a day) ( ) 3
- often (several times a day) ( ) 4
- very often (several times an hour) ( ) 5

ZD3 How often must you miss or delay a break because of having too much work to do?

- very rarely/never ( ) 1
- rarely (approximately once a week) ( ) 2
- occasionally (approximately once a day) ( ) 3
- often (several times a day) ( ) 4
- very often (several times an hour) ( ) 5

ZD4 How often must you finish work later because of having too much to do?

- very rarely/never ( ) 1
- rarely (approximately once a week) ( ) 2
- occasionally (approximately once a day) ( ) 3
- often (several times a day) ( ) 4
- very often (several times an hour) ( ) 5

ZD6 How often is a fast pace of work, required of you?

- very rarely/never ( ) 1
- rarely (approximately once a week) ( ) 2
- occasionally (approximately once a day) ( ) 3
- often (several times a day) ( ) 4
- very often (several times an hour) ( ) 5

The following part concerns how well you can make contact with others, help others, or communicate with others. Please consider spatial, technical, and organizational aspects, but please do **not** consider social aspects (e.g., you don't like someone, and thus want no contact with him or her) or aspects regarding ability (you are not capable of helping someone).

KOM1 With how many different colleagues is it possible for you to establish contact during work (e.g. to talk with them about private or work related subjects)?

- with no one  1
- with 1-2 people  2
- with 3-5 people  3
- with 6-10 people  4
- with more than 10 people  5

KOM2 On average, how many other people (e.g. clients) do you have contact with in the course of your work day?

- with no one  1
- with 1-2 people  2
- with 3-5 people  3
- with 6-10 people  4
- with more than 10 people  5

KOM3 In the course of your work, is it possible for you to chat with your colleagues about things that are not related to your work?

- yes, without difficulty  1
- yes, with little difficulty  2
- with some difficulty  3
- with much difficulty  4
- practically impossible  5

KSP3 Usually, **A** can decide for him- or herself who he/she will work with.

**B** is always told who he/she will work with.

Which of the above mostly resembles your job?

- exactly like A  1
- rather like A  2
- between A and B  3
- rather like B  4
- exactly like B  5
  
- I do not work together with anyone  9

**KSP4** If **A** does not get along with a colleague, he/she can work with someone else in the future.  
 If **B** does not get along with another colleague, he/she must still work with him/her.  
 Which of the above mostly resembles your job?

- exactly like A ( ) 1
- rather like A ( ) 2
- between A and B ( ) 3
- rather like B ( ) 4
- exactly like B ( ) 5
  
- I do not work together with anyone ( ) 9

**KSP5** Usually, **A** can decide for him-/herself whether he/she will work alone or with a colleague.  
**B** is told whether he or she will work alone or with a colleague.  
 Which of the above mostly resembles your job?

- exactly like A ( ) 1
- rather like A ( ) 2
- between A and B ( ) 3
- rather like B ( ) 4
- exactly like B ( ) 5
  
- I do not work together with anyone ( ) 9

**KOP1** To what degree does your work depend on how fast or how slowly your colleagues work?

- not at all ( ) 1
- to a small degree ( ) 2
- somewhat ( ) 3
- to a large degree ( ) 4
- to a very large degree ( ) 5

**KOP2** To what degree does your work depend on how well or how poorly your colleagues work?

- not at all ( ) 1
- to a small degree ( ) 2
- somewhat ( ) 3
- to a large degree ( ) 4
- to a very large degree ( ) 5

**KOP3** Whenever **A** makes a mistake in his/her work, this has an immediate effect on his/her colleagues.  
 Whenever **B** makes a mistake in his/her work, this has no consequences for his or her colleagues, but only for him- or herself.  
 Which of the above mostly resembles your job?

- exactly like A ( ) 1
- rather like A ( ) 2
- between A and B ( ) 3
- rather like B ( ) 4
- exactly like B ( ) 5

KOP7 To what degree are your colleagues dependent on your work pace?

- not at all ( ) 1
- to a small degree ( ) 2
- somewhat ( ) 3
- to a large degree ( ) 4
- to a very large degree ( ) 5

KOP8 To what degree are your colleagues dependent on how well or how poorly you work?

- not at all ( ) 1
- to a small degree ( ) 2
- somewhat ( ) 3
- to a large degree ( ) 4
- to a very large degree ( ) 5

**Please answer the following questions only if you work together with someone else. If you do not work with anyone, please turn XX pages to question XX.**

KER1 Here, complex decisions are made...

- mostly mutually ( ) 1
- rather mutually ( ) 2
- sometimes alone, sometimes mutually ( ) 3
- rather alone ( ) 4
- there are no complex decisions to be made ( ) 5

KER2 To what degree does your work require mutual planning with your colleagues?

- to a very large degree ( ) 1
- to a large degree ( ) 2
- somewhat ( ) 3
- to a small degree ( ) 4
- to a very small degree/not at all ( ) 5

KER3 To what degree does your work require that you are aware of the progress of your colleagues?

- to a very small degree/not at all ( ) 1
- to a small degree ( ) 2
- somewhat ( ) 3
- to a large degree ( ) 4
- to a very large degree ( ) 5

KER4 To what degree must your colleagues be aware of your progress?

- to a very small degree ( ) 1
- to a small degree ( ) 2
- somewhat ( ) 3
- to a large degree ( ) 4
- to a very large degree ( ) 5
